# Supplementary figures and images for: Autophagy-Related Protein ATG8 Has a Noncanonical Function for Apicoplast Inheritance in Toxoplasma gondii
Source: PubMed Central journal article supplement — mBio. 2015 Oct 27;6(6):e01446-15. doi: 10.1128/mBio.01446-15 (PMC4626856; doi:10.1128/mbio.01446-15), 2015-10-27

**A**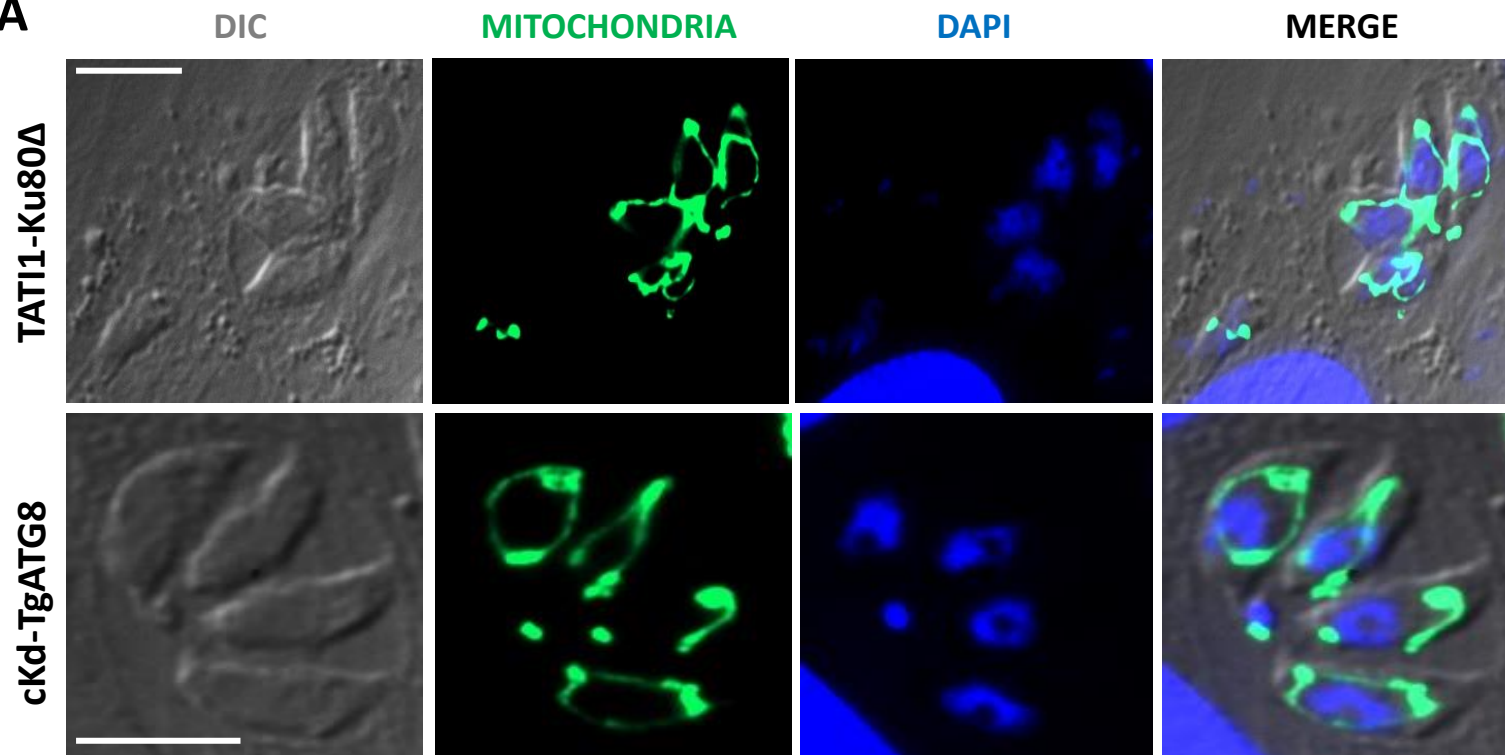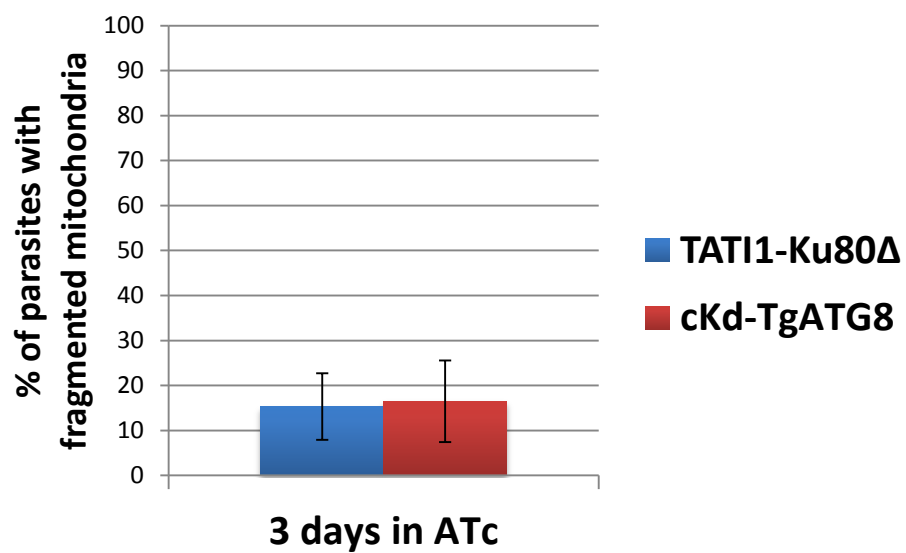

**B**

DIC

AMA1

DAPI

MERGE

TATI1-Ku80Δ

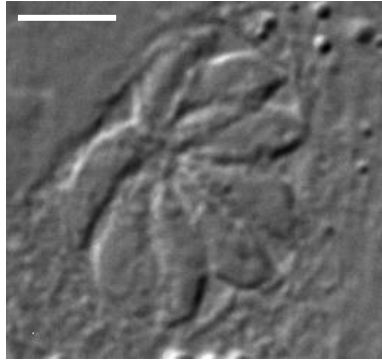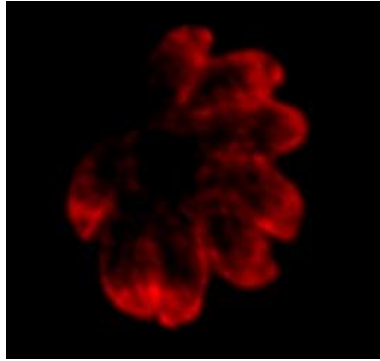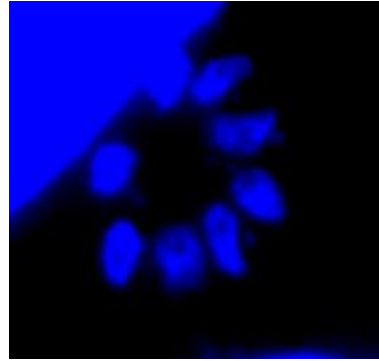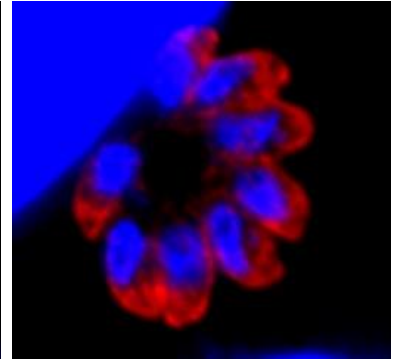

cKd-TgATG8

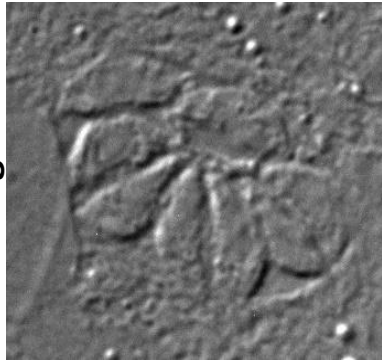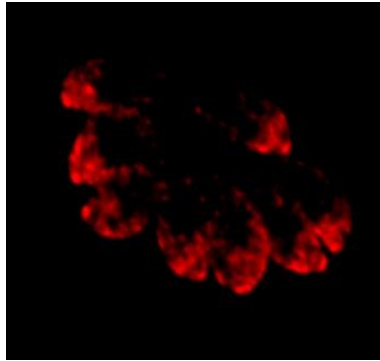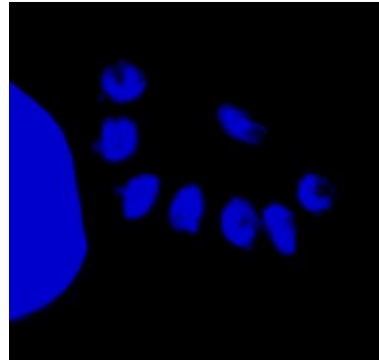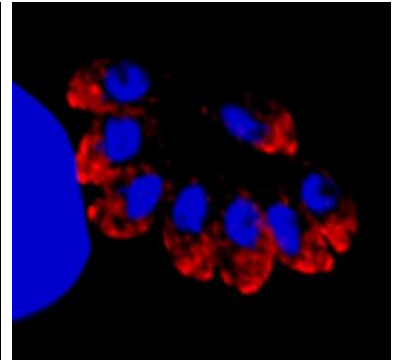

C

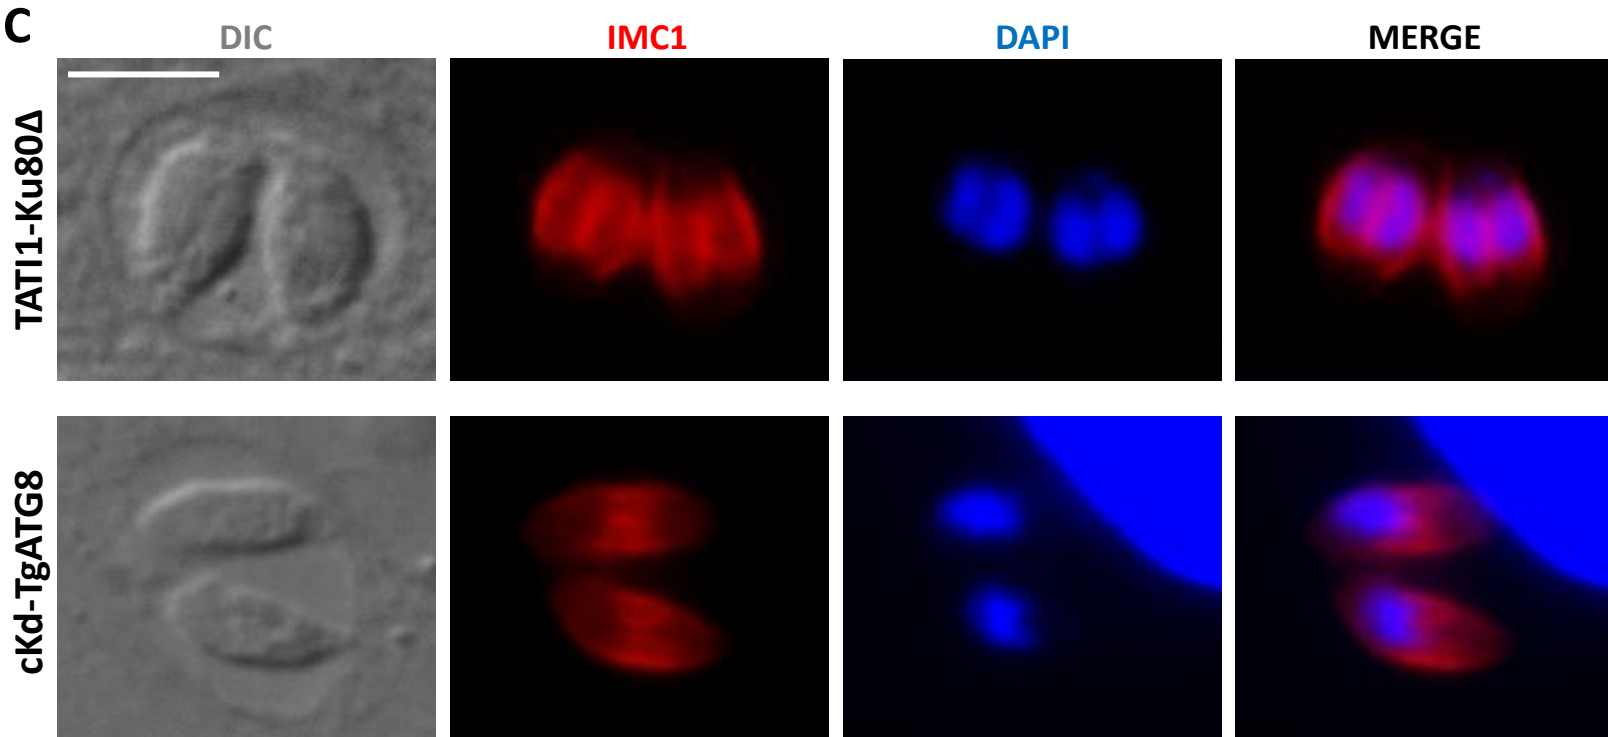

**D**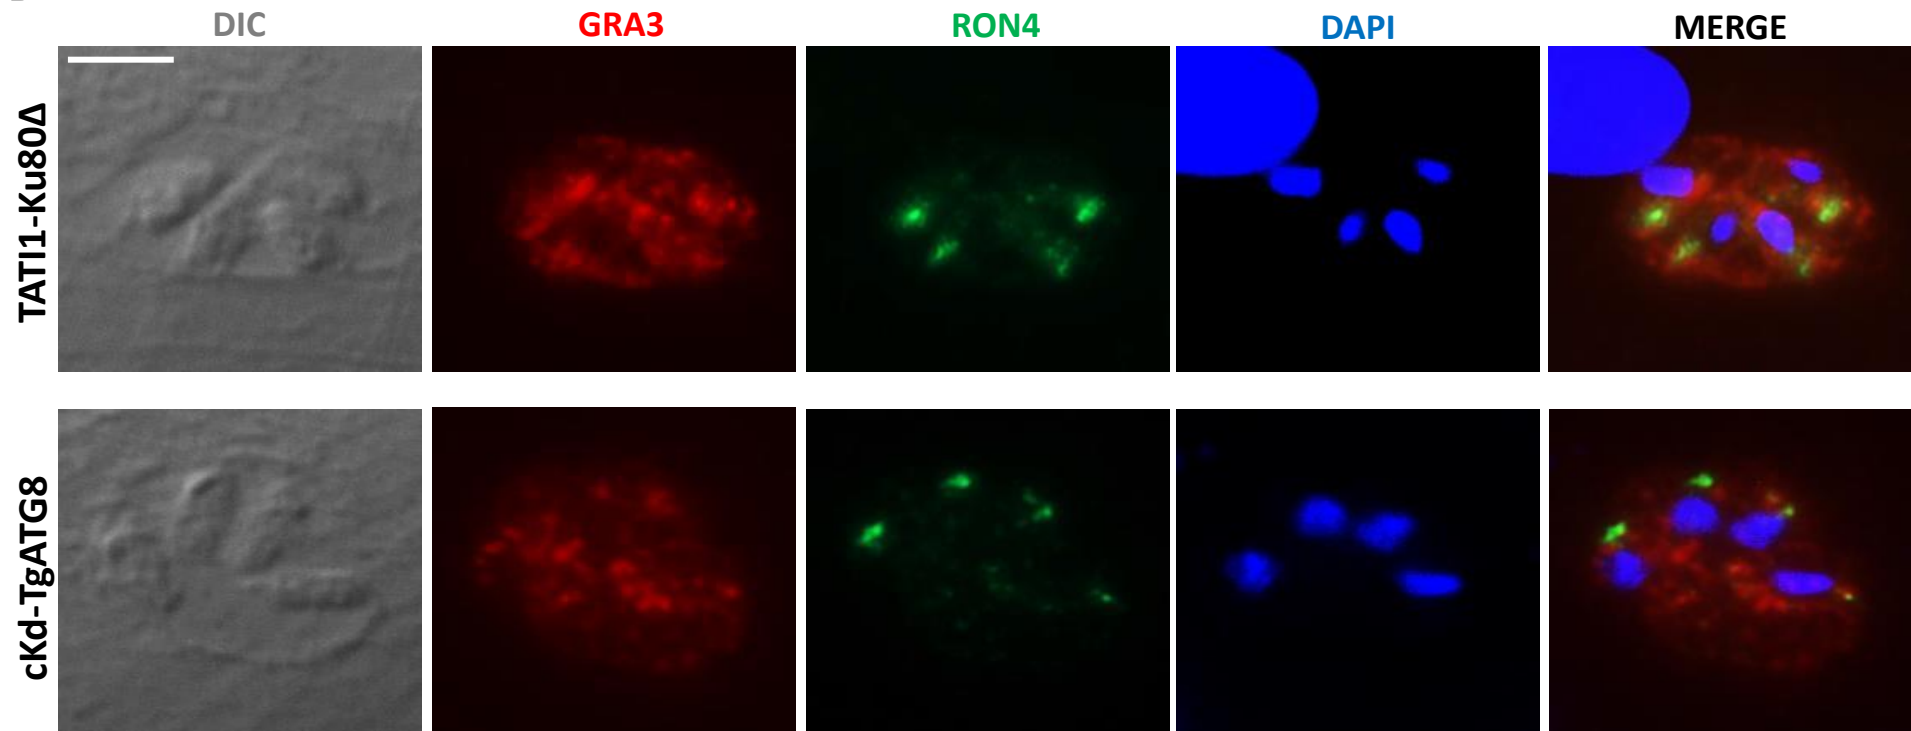

Supplement: mbo005152521sf6.pdf [file mbo005152521sf6.pdf]
